# Supplementary material for: The isomerisation of (Z)-3-[2H1]-phenylprop-2-enone as a measure of the rate of hydroperoxide addition in Weitz–Scheffer and Juliá–Colonna epoxidations
Source: Royal Society of Chemistry journal article supplement (doi:10.1039/b404389h), 2004-01-01
Supplement: b404389h.doc [file b404389h.doc]

Supplementary data for:

The Isomerisation of (*Z*)-3-[2H1]-phenylprop-2-enone as a Measure of the Rate of Hydroperoxide Addition in Weitz-Scheffer and Juliá-Colonna Epoxidations

David R. Kelly,*a Eva Caroff,b Robert W. Flood,b William Healb and Stanley M. Roberts*b

*a* Department of Chemistry, Cardiff University, P. O. Box 912, Cardiff, CF10 3TB, Wales, UK. Fax: (44) 029-20874030; Tel: 029-20874063; E-mail: KellyDR@Cardiff.ac.uk

b Department of Chemistry, University of Liverpool, Liverpool, L69 3BX. Tel: 0151-7943501; E-mail: SMRSM@liverpool.ac.uk

**Preparation of (*R*)-Oxiranyl Phenyl Methanone**

Route starting from the commercially available (2*R*,3*S*)-*trans*-3-phenyloxirane-2-methanol.

*Reagents and conditions:* i) PhCO2H, Ti(O*i*Pr)4, DCM, 45% ii) TsCl, py, DCM, 42% iii) NaH, DMSO (cat.), DCM, 32% iv) NaOMe, THF, 99% v) Dess-Martin periodinane, DCM, 36%

# (1*S*,2*R*)-Benzoic acid-2,3-dihydroxy-1-phenyl-propyl ester

(2*R*,3*R*)-*trans*-3-Phenyloxirane-2-methanol (1.00 g, 6.66 mmol) and benzoic acid (895.0 mg, 7.32 mmol) were placed under nitrogen, dissolved in dry dichloromethane (45 mL) and stirred for 20 min. The reaction mixture was diluted with diethyl ether (10 mL) and aqueous sulphuric acid (5.0 %, 10 mL) was added. The emulsion formed was filtered through a pad of celite and the aqueous layer was extracted with diethyl ether (2 x 100 mL). The combined organic layers were dried over magnesium sulphate and concentrated by rotary evaporation. The yellow oil recovered was purified by flash column chromatography (150 g silica, hexane/ethyl acetate (1:1), Rf = 0.21) giving (1*S*,2*R*)-benzoic acid 2,3-dihydroxy-1-phenyl-propyl ester as a clear colourless oil (810 mg, 45% yield). **H/ppm (400 MHz, CDCl3), 1.75 (1H, s, OH), 2.20 (1H, s, OH), 3.73 (1H, dd, CH2, *Jtrans* 5.7 Hz, *Jgem* 11.7 Hz), 3.81 (1H, dd, CH2, *Jcis* 3.2 Hz, *Jgem* 11.7 Hz), 4.11 (1H, ddd, CH(OH), *Jcis* 3.2 Hz, *Jtrans* 5.7 Hz, *J* 7.1 Hz), 6.0 (1H, d, PhCH, *J* 7.1 Hz), 7.30-8.10 (5H, m, Ph);**C/ppm (100 MHz, CDCl3), 63.2 (CH2), 74.4 (CH(OH)), 76.5 (PhCH), 127.7-137.4 (2 x Ph), 166.2 (CO); *m*/*z* (%) (CI), 290 ([M + NH4]+, 33), 273 (M+, 15), 255 (100), 105 (51); found 273.11326 (C16H17O4 [M + NH4]+ requires 273.11267).

**(1*S*,2R)-Benzoic acid 2-hydroxy-1-phenyl-3-(toluene-4-sulfonyloxy)-propyl ester**

To *para*-toluene sulphonyl chloride (200 mg, 1.05 mmol) under nitrogen was added a solution of benzoic acid 2,3-dihydroxy-1-phenyl-propyl ester (251 mg, 0.95 mmol) in dichloromethane (5.0 mL). The reaction mixture was cooled to –78°C and pyridine (192 **L, 2.38 mmol) was added. The reaction mixture was allowed to warm to room temperature and was stirred for 3 days. The reaction was quenched by the addition of saturated aqueous sodium hydrogen carbonate (2.5 mL). The biphasic mixture was extracted thoroughly with dichloromethane and the combined organic extracts dried over magnesium sulphate. The solvent was removed under reduced pressure giving the crude product as a pale yellow oil. The (1*S*,2*R*)-benzoic acid 2-hydroxy-1-phenyl-3-(toluene-4-sulfonyloxy)-propyl ester was obtained by flash column chromatography (100 g silica, hexane/ethyl acetate (1:1), Rf = 0.48) as a white crystalline solid (171.3 mg, 42% yield). **H/ppm (400 MHz, CDCl3), 2.27 (1H, s, OH), 2.36 (3H, s, CH3), 4.12-4.30 (3H, m, CH(OH)CH2), 5.95 (1H, d, PhCH, J 6.3 Hz), 7.15-8.01 (14H, m, Ar); **C/ppm (100 MHz, CDCl3), 21.9 (CH3), 70.4 (CH2), 72.2 (CH(OH)), 76.1 (PhCH), 127.5, 127.6, 128.3, 128.4, 128.5, 128.8, 128.9, 129.1, 129.2, 130.0, 130.1, 130.2, 130.3, 132.8, 133.8, 136.7, 145.4, 145.5 (3 x Ph), 165.5 (CO).

# (1*S*,2*R*)-Benzoic acid oxiranyl-phenyl-methyl ester

To sodium hydride (15.5 mg, 0.39 mmol) under nitrogen was added a solution of (1*S*,2*R*)-benzoic acid 2-hydroxy-1-phenyl-3-(toluene-4-sulfonyloxy)-propyl ester (150 mg, 0.35 mmol) in dichloromethane (1.73 mL). To this was added dimethylsulphoxide (2.5 **L, 40 **mol). The reaction was stirred at room temperature for 12 hours after which time it had gone to completion by TLC. The reaction was quenched by the addition of water (3.0 mL) and extracted thoroughly with dichloromethane. The combined organic extracts were dried over magnesium sulphate and the solvent removed under reduced pressure. This gave the crude product as a pale yellow oil. Purification by flash column chromatography (60 g silica, hexane/ethyl acetate (3:1), Rf = 0.51) gave pure (1*S*,2*R*)-benzoic acid oxiranyl-phenyl-methyl ester as a clear colourless oil (28.7 mg, 32% yield). **H/ppm (400 MHz, CDCl3), 2.75 (1H, dd, CH(O)CH2, *Jcis* 2.6 Hz, *Jgem* 5.1 Hz), 2.85 (1H, dd, CH(O)CH2, *Jtrans* 4.0 Hz, *Jgem* 5.1 Hz), (1H, ddd, CH(O)CH2, *Jcis* 2.6 Hz, *Jtrans* 4.0 Hz, *J* 4.1 Hz), 6.09 (1H, d, PhCH, *J* 4.2 Hz), 7.37-8.10 (10H, m, 2 x Ph); **C/ppm (100 MHz, CDCl3), 45.4 (CH2), 53.4 (CH(O)CH2), 75.0 (PhCH).

**(1*S*,2*R*)-Oxiranyl-phenyl-methanol**

To sodium hydride (6.37 mg, 0.17 mmol) under nitrogen was added a solution of (1*S*,2*R*)-benzoic acid oxiranyl-phenyl-methyl ester (28.7 mg, 0.11 mmol) in tetrahydrofuran (5.0 mL). To this mixture was added anhydrous methanol (4.5 **L, 0.11 mmol). The reaction mixture was stirred for 18 hours at room temperature after which the reaction had gone to completion by TLC (hexane/ethyl acetate (3:1), Rf = 0.20). The reaction mixture was cooled to – 78°C before the addition of a few drops of acetic acid. To this mixture was added water (5.0 mL) and the reaction mixture allowed to warm to room temperature. The biphasic mixture was extracted thoroughly with dichloromethane, the combined organic layers were dried over magnesium sulphate and all volatile material was removed by rotary evaporation to give (1*S*,2*R*)-oxiranyl-phenyl-methanol as a clear colourless oil (single spot by TLC, 25.5 mg, 99% yield). **H/ppm (200 MHz, CDCl3), 2.35 (1H, s, OH), 2.78 (1H, dd, CH(O)CH2, *Jtrans* 4.0 Hz, *Jgem* 5.2 Hz), 2.98 (1H, dd, CH(O)CH2, *Jcis* 2.8 Hz, *Jgem* 5.2 Hz), 3.23 (1H, ddd, CH(O)CH2, *Jcis* 2.8 Hz, *Jtrans* 4.0 Hz, *J* 2.8 Hz), 4.95 (1H, d, CH(OH), *J* 2.8 Hz), 7.25-8.10 (5H, m, Ph).

**(2*R*)-Oxiranyl phenyl methanone (from (1*S*,2*R*)-Oxiranyl-phenyl-methanol)**

To Dess-Martin periodinane (70.0 mg, 0.17 mmol) under nitrogen was added a solution of (1*S*,2*R*)-oxiranyl-phenyl-methanol (25.5 mg, 0.11 mmol) in dichloromethane (3 mL). After stirring for 24 hours at room temperature the reaction was found to be complete by TLC. The reaction was quenched by the addition of saturated aqueous sodium thiosulphate (3 mL) and the resultant biphasic mixture extracted thoroughly with dichloromethane. The combined organic layers were dried over magnesium sulphate and concentrated by rotary evaporation. This gave the crude product as a clear colourless oil. Purification by crude filtration through silica (hexane, Rf = 0.82) gave (2*R*)-oxiranyl phenyl methanone as a crystalline solid (5.9 mg, 36% yield). 99.77 % pure by chiral HPLC. [**]+ 54.95 (c 0.74, CH2Cl2); mpt 64-66°C; **H/ppm (200 MHz, CDCl3), 2.89 (1H, dd, CH(O)CH2, *Jcis* 2.4 Hz, *Jgem* 6.5 Hz), 3.13 (1H, dd, CH(O)CH2, *Jtrans* 4.5 Hz, *Jgem* 6.5 Hz), 4.25 (1H, dd, CH(O)CH2, *Jcis* 2.4 Hz, *Jtrans* 4.5 Hz), 7.40 – 8.07 (5H, m, Ph).

**(2*R*)-Oxiranyl phenyl methanone** from polyleucine catalysed epoxidation. IR (film) 1689; δH (CDCl3) 2.89 (1H, dd, *J* 6.5, 2.5), 3.12 (1H, dd, *J* 6.5, 4.5 Hz), 4.23 (1H, dd, *J* 4.5, 2.5) 7.49-8.08 (5H, m). δC(CDCl3) 47.5, 51.2, 128.4, 128.9, 133.9, 135.5, 194.7. Found: C, 72.7; H, 5.4. C9H8O2 requires C, 72.95; H, 5.45 %. [α]D22 + 60.8 (c 0.74, CH2Cl2), m.p. 64-66C.

Checked revision, email 17/10/03
